# Supplementary material for: A compositional mediation model for a binary outcome: Application to microbiome studies
Source: Oxford University Press journal article supplement (doi:10.1093/bioinformatics/btab605), 2021-08-18
Supplement: btab605_supplementary_data.pdf [file btab605_supplementary_data.pdf]

# Compositional Mediation Model for Binary Outcomes: Application to Microbiome Samples

## Supplementary Materials

By Michael B. Sohn, Jiarui Lu, and Hongzhe Li

### A Estimation of Composition Parameters

To estimate the parameters in Model (1), we propose the following objective function, which minimizes the composition norm of the difference between observed and estimated compositions,

$$\begin{aligned}
\hat{\mathbf{a}} &= \operatorname{argmin}_{\mathbf{a}, \mathbf{h}_r, \mathbf{m}_0 \in \mathbb{S}^{k-1}} \sum_{i=1}^n \left\| M_i \ominus (\mathbf{m}_0 \oplus \mathbf{a}^{T_i} \oplus \mathbf{h}_1^{X_{i1}} \oplus \dots \oplus \mathbf{h}_q^{X_{iq}}) \right\|^2 & (S1) \\
&= \operatorname{argmin}_{\mathbf{a}, \mathbf{h}_r, \mathbf{m}_0 \in \mathbb{S}^{k-1}} \sum_{i=1}^n \sum_{j=1}^{k-1} \left\{ (k-1) \left[ \log \left( \frac{M_{ij} m_{0k} a_k^{T_i} \prod_{r=1}^q h_{rk}^{X_{ir}}}{M_{ik} m_{0j} a_j^{T_i} \prod_{r=1}^q h_{rj}^{X_{ir}}} \right) \right]^2 \right. \\
&\quad \left. - \log \left( \frac{M_{ij} m_{0k} a_k^{T_i} \prod_{r=1}^q h_{rk}^{X_{ir}}}{M_{ik} m_{0j} a_j^{T_i} \prod_{r=1}^q h_{rj}^{X_{ir}}} \right) \sum_{\ell \neq j}^{k-1} \log \left( \frac{M_{i\ell} m_{0k} a_k^{T_i} \prod_{r=1}^q h_{rk}^{X_{ir}}}{M_{ik} m_{0\ell} a_\ell^{T_i} \prod_{r=1}^q h_{r\ell}^{X_{ir}}} \right) \right\}.
\end{aligned}$$

The objective function (S1) is convex in terms of  $\operatorname{alt}(\mathbf{a})_j$ ,  $\operatorname{alt}(\mathbf{m}_0)_j$ , and  $\operatorname{alt}(\mathbf{h}_r)_j$  for  $j = 1, \dots, k-1$ ;  $r = 1, \dots, q$ . Thus, the optimal solution can be obtained by solving the following system of linear equations with constraints  $\mathbf{m}_0, \mathbf{a}, \mathbf{h}_r \in \mathbb{S}^{k-1}$ :

$$\begin{bmatrix} D(1) & D(T) & D(X_1) & \dots & D(X_q) \\ D(T) & D(T^2) & D(TX_1) & \dots & D(TX_q) \\ D(X_1) & D(TX_1) & D(X_1^2) & \dots & D(X_1X_q) \\ \vdots & \vdots & \vdots & \ddots & \vdots \\ D(X_q) & D(TX_q) & D(X_1X_q) & \dots & D(X_q) \end{bmatrix} \begin{bmatrix} \operatorname{alt}(\mathbf{m}_0) \\ \operatorname{alt}(\mathbf{a}) \\ \operatorname{alt}(\mathbf{h}_1) \\ \vdots \\ \operatorname{alt}(\mathbf{h}_q) \end{bmatrix} = \begin{bmatrix} \zeta_0 \\ \zeta_1 \\ \xi_1 \\ \vdots \\ \xi_q \end{bmatrix},$$

where  $\zeta_{0j} = k \sum_{i=1}^n \log M_{ij} - \sum_{\ell=1}^k \sum_{i=1}^n \log M_{i\ell}$ ,  $\zeta_{1j} = k \sum_{i=1}^n T_i \log M_{ij} - \sum_{\ell=1}^k \sum_{i=1}^n T_i \log M_{i\ell}$ ,  $\xi_{rj} = k \sum_{i=1}^n X_{ir} \log M_{ij} - \sum_{\ell=1}^k \sum_{i=1}^n X_{ir} \log M_{i\ell}$ , and for any  $\nu$ ,  $D(\nu)$  is defined as

$$D(\nu) = \begin{bmatrix} (k-1) \sum_{i=1}^n \nu_i & - \sum_{i=1}^n \nu_i & \dots & - \sum_{i=1}^n \nu_i \\ - \sum_{i=1}^n \nu_i & (k-1) \sum_{i=1}^n \nu_i & \dots & - \sum_{i=1}^n \nu_i \\ \vdots & \vdots & \ddots & \vdots \\ - \sum_{i=1}^n \nu_i & - \sum_{i=1}^n \nu_i & \dots & (k-1) \sum_{i=1}^n \nu_i \end{bmatrix}.$$

## B Estimation of Regression Parameters

Let  $\eta_i = 2y_i - 1$ ,  $\mathbf{z}_i = (1, t_i, \log(\mathbf{m}_i)^\top, \mathbf{x}_i^\top)^\top$ ,  $\boldsymbol{\beta} = (c_0, c, \mathbf{b}^\top, \mathbf{g}^\top)^\top$ , and  $q(\eta_i \mathbf{z}_i^\top \boldsymbol{\beta}) = -\log \Phi(\eta_i \mathbf{z}_i^\top \boldsymbol{\beta})$ . Then, an  $L_1$ -penalized log-likelihood function for Model (2) is given by

$$\hat{\boldsymbol{\beta}} = \underset{\boldsymbol{\beta}}{\operatorname{argmin}} \left\{ \frac{1}{n} \sum_{i=1}^n q(\eta_i \mathbf{z}_i^\top \boldsymbol{\beta}) \right\}, \quad \text{subject to } \|\boldsymbol{\beta}\|_1 \leq t \text{ and } \mathbf{1}_k^\top \mathbf{b} = 0, \quad (\text{S2})$$

where  $t \geq 0$  is some constant. By the Taylor expansion, we have

$$\begin{aligned} q(\eta_i \mathbf{z}_i^\top \boldsymbol{\beta}) &= q(\eta_i \mathbf{z}_i^\top \boldsymbol{\beta}_0) + (\boldsymbol{\beta} - \boldsymbol{\beta}_0)^\top G(\eta_i \mathbf{z}_i^\top \boldsymbol{\beta}_0) + \frac{1}{2} (\boldsymbol{\beta} - \boldsymbol{\beta}_0)^\top H(\eta_i \mathbf{z}_i^\top \boldsymbol{\beta}^*) (\boldsymbol{\beta} - \boldsymbol{\beta}_0) \\ &= \frac{1}{2} \left\{ \boldsymbol{\beta}^\top H(\eta_i \mathbf{z}_i^\top \boldsymbol{\beta}^*) \boldsymbol{\beta} + 2 [G(\eta_i \mathbf{z}_i^\top \boldsymbol{\beta}_0) - H(\eta_i \mathbf{z}_i^\top \boldsymbol{\beta}^*) \boldsymbol{\beta}_0]^\top \boldsymbol{\beta} + C \right\}, \end{aligned}$$

where  $G(\eta_i \mathbf{z}_i^\top \boldsymbol{\beta}_0) = \nabla_{\boldsymbol{\beta}} q(\eta_i \mathbf{z}_i^\top \boldsymbol{\beta}_0)$ ,  $H(\eta_i \mathbf{z}_i^\top \boldsymbol{\beta}^*) = \nabla_{\boldsymbol{\beta}}^2 q(\eta_i \mathbf{z}_i^\top \boldsymbol{\beta}^*)$ ,  $\boldsymbol{\beta}^*$  a vector that lies between  $\boldsymbol{\beta}_0$  and  $\boldsymbol{\beta}$ , and  $C$  is a constant with respect to  $\boldsymbol{\beta}$ . Since  $\sum_{i=1}^n H(\eta_i \mathbf{z}_i^\top \boldsymbol{\beta}^*) \succeq 0$ , finding a solution minimizing  $\sum_{i=1}^n q(\eta_i \mathbf{z}_i^\top \boldsymbol{\beta})$  is equivalent to finding a solution of  $\nabla_{\boldsymbol{\beta}} q(\eta_i \mathbf{z}_i^\top \boldsymbol{\beta}) = 0$ , that is,

$$\hat{\boldsymbol{\beta}} = \underset{\boldsymbol{\beta}}{\operatorname{argmin}} \left\{ \frac{1}{n} \sum_{i=1}^n q(\eta_i \mathbf{z}_i^\top \boldsymbol{\beta}) \right\} \Leftrightarrow \hat{\boldsymbol{\beta}} = \boldsymbol{\beta}_0 - \left( \sum_{i=1}^n H(\eta_i \mathbf{z}_i^\top \boldsymbol{\beta}^*) \right)^{-} \left( \sum_{i=1}^n G(\eta_i \mathbf{z}_i^\top \boldsymbol{\beta}_0) \right),$$

where  $A^-$  is the Moore-Penrose inverse of a matrix  $A$ . Note that  $\nabla_{\boldsymbol{\beta}} q(\eta_i \mathbf{z}_i^\top \boldsymbol{\beta}) = -\xi_i(\eta_i \mathbf{z}_i^\top \boldsymbol{\beta}) \mathbf{z}_i$ , where  $\xi_i(\eta_i \mathbf{z}_i^\top \boldsymbol{\beta}) = \eta_i \phi(\eta_i \mathbf{z}_i^\top \boldsymbol{\beta}) / \Phi(\eta_i \mathbf{z}_i^\top \boldsymbol{\beta})$  and  $\nabla_{\boldsymbol{\beta}}^2 q(\eta_i \mathbf{z}_i^\top \boldsymbol{\beta}) = \xi_i(\eta_i \mathbf{z}_i^\top \boldsymbol{\beta}) [\mathbf{z}_i^\top \boldsymbol{\beta} + \xi_i(\eta_i \mathbf{z}_i^\top \boldsymbol{\beta})] \mathbf{z}_i \mathbf{z}_i^\top$ . Substituting these terms, we have

$$\hat{\boldsymbol{\beta}} = \boldsymbol{\beta}_0 + (Z^\top \Xi Z)^- Z^\top \boldsymbol{\xi}(\boldsymbol{\beta}_0) = (Z^\top \Xi Z)^- Z^\top \boldsymbol{\Xi} \mathbf{u},$$

where  $\Xi$  is an  $n \times n$  diagonal matrix with the  $i^{\text{th}}$  diagonal term  $\Xi_{ii} = \xi_i(\eta_i \mathbf{z}_i^\top \boldsymbol{\beta}^*) [\mathbf{z}_i^\top \boldsymbol{\beta}^* + \xi_i(\eta_i \mathbf{z}_i^\top \boldsymbol{\beta}^*)]$ ,  $\boldsymbol{\xi}(\boldsymbol{\beta}_0) = (\xi_1(\eta_1 \mathbf{z}_1^\top \boldsymbol{\beta}_0), \dots, \xi_n(\eta_n \mathbf{z}_n^\top \boldsymbol{\beta}_0))^\top$ , and  $\mathbf{u} = Z \boldsymbol{\beta}_0 + \Xi^- \boldsymbol{\xi}(\boldsymbol{\beta}_0)$ . This is, given  $\boldsymbol{\beta}^*$  and  $\boldsymbol{\beta}_0$ , the solution of a weighted least squares problem with a weight matrix  $\Xi$ , a dependent variable  $\mathbf{u}$ , and independent variables  $Z$ , that is,

$$\hat{\boldsymbol{\beta}} = \underset{\boldsymbol{\beta}}{\operatorname{argmin}} \|\Xi^{1/2} (\mathbf{u} - Z\boldsymbol{\beta})\|_2^2.$$

Therefore, optimization problem (S2) can be expressed as

$$\hat{\boldsymbol{\beta}} = \underset{\boldsymbol{\beta}}{\operatorname{argmin}} \left\{ \frac{1}{2n} \|\Xi^{1/2} (\mathbf{u} - \tilde{Z}\boldsymbol{\beta})\|_2^2 + \lambda \|\boldsymbol{\beta}\|_1 \right\}, \quad \text{s.t. } \boldsymbol{\iota}^\top \boldsymbol{\beta} = 0, \quad (\text{S3})$$

where  $\tilde{Z} = Z(\mathcal{I}_p - \boldsymbol{\iota} \boldsymbol{\iota}^\top / k)$  and  $\boldsymbol{\iota}^\top = (0, 0, 1, \dots, 1, 0, \dots, 0)$ . Note that  $Z\boldsymbol{\beta} = \tilde{Z}\boldsymbol{\beta}$  because  $\boldsymbol{\iota}^\top \boldsymbol{\beta} = 0$ . The objective function in this alternative optimization problem, particularly  $\Xi$  and  $\mathbf{u}$ , depend on unknown quantities,  $\boldsymbol{\beta}^*$  and  $\boldsymbol{\beta}_0$ . Therefore, we propose a method that combines iteratively reweighted least squares and coordinate descent method of multipliers (IRLS-CDMM). To derive an algorithm for this constrained optimization problem, we first form the augmented Lagrangian,

$$L_\mu(\boldsymbol{\beta}, \varsigma) = \frac{1}{2n} \|\Xi^{1/2} (\mathbf{u} - \tilde{Z}\boldsymbol{\beta})\|_2^2 + \lambda \|\boldsymbol{\beta}\|_1 + \varsigma \boldsymbol{\iota}^\top \boldsymbol{\beta} + \frac{\mu}{2} (\boldsymbol{\iota}^\top \boldsymbol{\beta})^2,$$

where  $\varsigma$  is the Lagrange multiplier and  $\mu > 0$  is a penalty parameter. Defining a scaled Lagrange multiplier  $\alpha = \varsigma / \mu$ , we obtain the solution of optimization problem (S3) given  $\Xi$  and  $\mathbf{u}$  by iterating

$$\boldsymbol{\beta}^{(\ell+1)} \leftarrow \underset{\boldsymbol{\beta}}{\operatorname{argmin}} \left\{ \frac{1}{2n} \|\Xi^{1/2} (\mathbf{u} - \tilde{Z}\boldsymbol{\beta})\|_2^2 + \lambda \|\boldsymbol{\beta}\|_1 + \frac{\mu}{2} (\boldsymbol{\iota}^\top \boldsymbol{\beta} + \alpha^{(\ell)})^2 \right\}; \quad (\text{S4})$$

$$\alpha^{(\ell+1)} \leftarrow \alpha^{(\ell)} + \boldsymbol{\iota}^\top \boldsymbol{\beta}^{(\ell+1)}. \quad (\text{S5})$$

Since the  $L_1$  terms are now separable, optimization problem (S4), can be solved by the coordinate decent method,

$$\beta_j^{(\ell+1)} \leftarrow \frac{1}{\tilde{w}_j} S_\lambda \left\{ \frac{1}{n} \tilde{\mathbf{z}}_j^\top \Xi^{(\ell)} \left( \mathbf{u}^{(\ell)} - \sum_{i \neq j} \beta_i^{(\ell+1)} \tilde{\mathbf{z}}_i \right) - \mu \left( \sum_{i \neq j} \beta_i^{(\ell+1)} \frac{\iota_i \iota_j}{k} + \alpha^{(\ell)} \frac{\iota_j}{\sqrt{k}} \right) \right\}, \quad (\text{S6})$$

where  $\tilde{\mathbf{z}}_k$  is the  $k^{\text{th}}$  column vector of  $\tilde{Z}$ ,  $\tilde{w}_j = \|\tilde{\mathbf{z}}_j\|_2^2/n + \mu/k$ , and  $S_\lambda(t) = \text{sgn}(t)(|t| - \lambda)_+$ . We repeat Iterations (S4)-(S5) with the updated  $\Xi^{(\ell)}$  and  $\mathbf{u}^{(\ell)}$ , as in Algorithm 1.

---

**Algorithm 1** IRLS-CDMM
 

---

- 1: Initialize  $\beta^{(0)}$ ,  $\alpha^{(0)}$ ,  $\Xi^{(0)}$ , and  $\mathbf{u}^{(0)}$
  - 2: **repeat**
  - 3:     **for**  $j = 1$  to  $p$  **do**
  - 4:         Update  $\beta_j^{(\ell+1)}$  using (S6)
  - 5:         Update  $\alpha^{(\ell+1)}$  using (S5)
  - 6:     **end for**
  - 7:     Find  $\beta^{*(\ell+1)}$  by a line search that maximizes  $\sum_{i=1}^n \log \Phi(\eta_i \mathbf{z}_i^\top \beta)$
  - 8:     Update  $\Xi^{(\ell+1)}$  and  $\mathbf{u}^{(\ell+1)}$
  - 9:      $\ell \leftarrow \ell + 1$
  - 10: **until** convergence
- 

## C De-biasing Procedure

Let  $\hat{\Sigma} = \tilde{Z}^\top \hat{\Xi} \tilde{Z}/n$ , where  $\hat{\Xi}$  is an estimate of  $\Xi$  obtained from Algorithm 1,  $\mathbf{e}_j \in \mathbb{R}^p$  be the vector with one at the  $j^{\text{th}}$  position and zero everywhere else, and  $\gamma$  be some constant. The matrix  $\tilde{\Theta}$  in Equation (6) can be obtained from Algorithm 2. To describe the logic behind Algorithm 2, define

---

**Algorithm 2** Constructing a de-biased estimator
 

---

- 1: **for**  $j = 1$  to  $p$  **do**
  - 2:      $\hat{\theta}_j \leftarrow \min_{\theta} \theta^\top \hat{\Sigma} \theta$  subject to  $\|\hat{\Sigma} \theta - (\mathcal{I}_p - \boldsymbol{\mu}^\top/k) \mathbf{e}_j\|_\infty \leq \gamma$
  - 3: **end for**
  - 4:  $\hat{\Theta} \leftarrow (\hat{\theta}_1, \dots, \hat{\theta}_p)^\top$ ;  $\tilde{\Theta} \leftarrow (\mathcal{I}_p - \boldsymbol{\mu}^\top/k) \hat{\Theta}$
  - 5:  $\hat{\beta}_{db} \leftarrow \hat{\beta} + \frac{1}{n} \tilde{\Theta} \tilde{Z}^\top \hat{\Xi} (\hat{\mathbf{u}} - \tilde{Z} \hat{\beta})$
- 

$\Sigma = \tilde{Z}^\top \Xi \tilde{Z}/n$  and suppose that  $V \Lambda V^\top$  is the eigenvalue decomposition of  $\Sigma$ . Since  $(V, \boldsymbol{\nu}/\sqrt{k})$  is full rank and orthonormal,  $\Sigma$  can be expressed as

$$\Sigma = (V, \boldsymbol{\nu}/\sqrt{k}) \begin{pmatrix} \Lambda & 0 \\ 0 & 0 \end{pmatrix} (V, \boldsymbol{\nu}/\sqrt{k})^\top,$$

where  $\Lambda = \text{diag}(\lambda_1, \dots, \lambda_{p-1})$ . Defining

$$\Theta = (V, \boldsymbol{\nu}/\sqrt{k}) \begin{pmatrix} \Lambda^{-1} & 0 \\ 0 & 0 \end{pmatrix} (V, \boldsymbol{\nu}/\sqrt{k})^\top,$$

we have  $\Sigma \Theta = \mathcal{I}_p - \boldsymbol{\mu}^\top/k$ , i.e.,  $\Theta$  is the inverse of  $\Sigma$  in the perpendicular space of  $\boldsymbol{\nu}$ .

## D Identification and Asymptotic Properties

### D.1 Notations

For an  $n \times m$  matrix  $A$ ,  $\|A\|_p$  is the  $\ell_p$  operator norm defined as

$$\|A\|_p = \sup_{\|\mathbf{x}\|_p=1} \|A\mathbf{x}\|_p,$$

where  $\|\mathbf{x}\|_p$  is the standard  $\ell_p$ -norm of a vector  $\mathbf{x}$ , and  $|A|_p$  is the element-wise  $\ell_p$  norm defined as

$$|A|_p = \left( \sum_{i,j} |A_{ij}|^p \right)^{1/p}.$$

In particular,

$$\|A\|_\infty = \max_{1 \leq i \leq n} \sum_{j=1}^m |A_{ij}|; \quad |A|_\infty = \max_{i,j} |A_{ij}|.$$

We denote by  $\theta_{s_1, s_2}(A)$  the restricted orthogonal constant of  $s_1$  and  $s_2$ , defined as

$$\theta_{s_1, s_2}(A) = \sup \frac{|\mathbf{r}_1^\top A^\top A \mathbf{r}_2|}{\|\mathbf{r}_1\|_2 \|\mathbf{r}_2\|_2},$$

where  $\mathbf{r}_1$  is a  $s_1$ -sparse vector,  $\mathbf{r}_2$  is a  $s_2$ -sparse vector, and  $\mathbf{r}_1$  and  $\mathbf{r}_2$  have non-overlapping support. The upper and lower restricted isometry property constants of order  $l$  are denoted by  $\varrho_l^+(A)$  and  $\varrho_l^-(A)$ , respectively, and defined as

$$\varrho_l^+(A) = \sup \frac{\|A\mathbf{r}\|_2^2}{\|\mathbf{r}\|_2^2}$$

and

$$\varrho_l^-(A) = \inf \frac{\|A\mathbf{r}\|_2^2}{\|\mathbf{r}\|_2^2},$$

where  $\mathbf{r} \in \mathbb{R}^m$  is an  $l$ -sparse vector. For a random variable  $X$ ,  $\|X\|_{\psi_1}$  is the sub-exponential norm defined as

$$\|X\|_{\psi_1} = \sup_{q \geq 1} q^{-1} (\mathbb{E}|X|^q)^{1/q},$$

and  $\|X\|_{\psi_2}$  is the sub-Gaussian norm defined as

$$\|X\|_{\psi_2} = \sup_{q \geq 1} q^{-1/2} (\mathbb{E}|X|^q)^{1/q}.$$

For a random vector  $\mathbf{X} \in \mathbb{R}^n$ , the sub-exponential norm is defined as

$$\|\mathbf{X}\|_{\psi_2} = \sup \{ \|\mathbf{X}^\top \boldsymbol{\alpha}\|_{\psi_2} : \boldsymbol{\alpha} \in \mathbb{R}^n, \|\boldsymbol{\alpha}\|_2 = 1 \}.$$

### D.2 Regularity Conditions

Necessary regularity conditions for asymptotic properties of the de-biased estimator include:

- C1. There exist uniform constants,  $C_{\min}$  and  $C_{\max}$ , such that  $0 < C_{\min} \leq \sigma_{\min}(\Sigma) \leq \sigma_{\max}(\Sigma) \leq C_{\max} < \infty$ , where  $\sigma_{\max}(A)$  ( $\sigma_{\min}(A)$ ) is the largest (smallest) non-zero eigenvalue of matrix  $A$ .
- C2.  $\Xi(\boldsymbol{\beta})$  is Lipschitz continuous with a Lipschitz constant  $v$ .
- C3.  $|\sum_{l=1}^n \Theta \tilde{Z}_l \tilde{Z}_l^\top / n|_\infty < \infty$ , where  $\tilde{Z}_l$  is a column vector of the  $l^{\text{th}}$  row of  $\tilde{Z}$ .
- C4. There exists a uniform constant  $\kappa \in (0, \infty)$  such that  $\|\Xi_{ll}^{1/2} \Theta^{1/2} \tilde{Z}_l\|_{\psi_2} \leq \kappa$  for all  $l = 1, \dots, n$ .

### D.3 Model Assumptions

Combined with the stable unit treatment value assumption (SUTVA) (Imbens and Rubin, 2015) and the positivity assumption (i.e.,  $0 < P(T_i = t | \mathbf{X}_i = \mathbf{x})$  and  $0 < P(\log \mathbf{M}_i(t) = \log \mathbf{m} | T_i = t, \mathbf{X}_i = \mathbf{x})$ ), the CMM requires the following assumptions:

$$\{Y_i(t', \log(\mathbf{m})), \log \mathbf{M}_i(t)\} \perp\!\!\!\perp T_i | \mathbf{X}_i = \mathbf{x} \quad (\text{S7})$$

$$Y_i(t', \log(\mathbf{m})) \perp\!\!\!\perp \log \mathbf{M}_i(t) | T_i = t, \mathbf{X}_i = \mathbf{x} \quad (\text{S8})$$

for  $t, t' \in \mathcal{T}$ ,  $\mathbf{m} \in \mathcal{M}$ , and  $\mathbf{x} \in \mathcal{X}$ . Assumptions (S7)-(S8) basically state no unmeasured confounding effects after adjusting for  $\mathbf{X}$ .

### D.4 Identification of Direct and Indirect Effects

*Proof.* With the causal assumptions in Section D.3, we have

$$\begin{aligned} \delta(\tau) &= \mathbb{E}[Y_i(\tau, \log \mathbf{M}_i(t)) - Y_i(\tau, \log \mathbf{M}_i(t')) | \mathbf{X}_i = \mathbf{x}] \\ &= \int \cdots \int \mathbb{E}[Y_i | \text{alt}(\mathbf{M}_i) = \text{alt}(\mathbf{m}), T_i = \tau, \mathbf{X}_i = \mathbf{x}] \\ &\quad \left[ dF_{\text{alt}(\mathbf{M}_i) | T_i=t, \mathbf{X}_i=\mathbf{x}}(\text{alt}(\mathbf{m})) - dF_{\text{alt}(\mathbf{M}_i) | T_i=t', \mathbf{X}_i=\mathbf{x}}(\text{alt}(\mathbf{m})) \right] dF_{\mathbf{X}_i}(\mathbf{x}) \\ &= \int \cdots \int \Pr\{c_0 + c\tau + \mathbf{b}_{-k}^\top \text{alt}(\mathbf{M}_i) + \mathbf{g}^\top \mathbf{x} + U_{2i} > 0\} \\ &\quad \left[ dF_{\text{alt}(\mathbf{M}_i) | T_i=t, \mathbf{X}_i=\mathbf{x}}(\text{alt}(\mathbf{m})) - dF_{\text{alt}(\mathbf{M}_i) | T_i=t', \mathbf{X}_i=\mathbf{x}}(\text{alt}(\mathbf{m})) \right] dF_{\mathbf{X}_i}(\mathbf{x}) \\ &= \int \cdots \int \Pr\{f_\delta(\tau, \mathbf{x}) + \mathbf{b}_{-k}^\top \text{alt}(\mathbf{a})t + \mathbf{b}_{-k}^\top \text{alt}(\mathbf{U}_{1i}) + U_{2i} > 0\} dF(\text{alt}(\mathbf{U}_{1i})) \\ &\quad - \int \cdots \int \Pr\{f_\delta(\tau, \mathbf{x}) + \mathbf{b}_{-k}^\top \text{alt}(\mathbf{a})t' + \mathbf{b}_{-k}^\top \text{alt}(\mathbf{U}_{1i}) + U_{2i} > 0\} dF(\text{alt}(\mathbf{U}_{1i})) \\ &= \int \cdots \int 1\{\mathbf{b}_{-k}^\top \text{alt}(\mathbf{U}_{1i}) + U_{2i} > -\mathbf{b}_{-k}^\top \text{alt}(\mathbf{a})t - f_\delta(\tau, \mathbf{x})\} dF(U_{2i}) dF(\text{alt}(\mathbf{U}_{1i})) \\ &\quad - \int \cdots \int 1\{\mathbf{b}_{-k}^\top \text{alt}(\mathbf{U}_{1i}) + U_{2i} > -\mathbf{b}_{-k}^\top \text{alt}(\mathbf{a})t' - f_\delta(\tau, \mathbf{x})\} dF(U_{2i}) dF(\text{alt}(\mathbf{U}_{1i})) \\ &= \Pr\{\varepsilon_i \leq -\mathbf{b}_{-k}^\top \text{alt}(\mathbf{a})t' - f_\delta(\tau, \mathbf{x})\} - \Pr\{\varepsilon_i \leq -\mathbf{b}_{-k}^\top \text{alt}(\mathbf{a})t - f_\delta(\tau, \mathbf{x})\} \end{aligned}$$

where  $f_\delta(\tau, \mathbf{x}) = c_0 + c\tau + \mathbf{b}_{-k}^\top (\text{alt}(\mathbf{m}_0) + \sum_{r=1}^{n_x} x_r \text{alt}(\mathbf{h}_r)) + \mathbf{g}^\top \mathbf{x}$  and  $\varepsilon_i = \mathbf{b}_{-k}^\top \text{alt}(\mathbf{U}_{1i}) + U_{2i}$ . The second equality is given in Sohn and Li (2019). The fourth equality follows from changing of variables and the independence between  $T_i$  and  $\text{alt}(\mathbf{U}_{1i})$ . The fifth equality is due to the independence between  $\text{alt}(\mathbf{U}_{1i})$  and  $U_{2i}$ . Since we assume  $U_{2i} \sim N(0, 1)$  and  $\mathbf{U}_{1i} \sim LN(\mathbf{0}, \Sigma)$ , we have  $\varepsilon_i \sim N(\mathbf{0}, \mathbf{b}_{-k}^\top \Sigma \mathbf{b}_{-k} + 1)$ . Note that  $\text{alt}(\mathbf{U}_{1i}) \sim N(\mathbf{0}, \Sigma)$  if and only if  $\mathbf{U}_{1i} \sim LN(\mathbf{0}, \Sigma)$  (Aitchison, 1986). Thus, we have

$$\delta(\tau) = \mathbb{E} \left\{ \Phi \left( \frac{(\log \mathbf{a})^\top \mathbf{b} t + f_\delta(\tau, \mathbf{X}_i)}{\sqrt{\mathbf{b}_{-k}^\top \Sigma \mathbf{b}_{-k} + 1}} \right) - \Phi \left( \frac{(\log \mathbf{a})^\top \mathbf{b} t' + f_\delta(\tau, \mathbf{X}_i)}{\sqrt{\mathbf{b}_{-k}^\top \Sigma \mathbf{b}_{-k} + 1}} \right) \right\}. \quad (\text{S9})$$

Similarly, we have

$$\zeta(\tau) = \mathbb{E} \left\{ \Phi \left( \frac{ct + f_\zeta(\tau, \mathbf{X}_i)}{\sqrt{\mathbf{b}_{-k}^\top \Sigma \mathbf{b}_{-k} + 1}} \right) - \Phi \left( \frac{ct' + f_\zeta(\tau, \mathbf{X}_i)}{\sqrt{\mathbf{b}_{-k}^\top \Sigma \mathbf{b}_{-k} + 1}} \right) \right\}. \quad (\text{S10})$$

□

## D.5 Asymptotic Properties of Debiased Estimators

To show asymptotic behaviors of debiased estimators, we will use the following Theorem S1 and Lemma S1.

**Theorem S1.** *Let  $\beta$  be  $s$ -sparse,  $\widehat{\beta}$  be the estimator for Objective function (5) given  $\mathbf{u}$  and  $\Xi$ , and  $\epsilon = \mathbf{u} - \widetilde{Z}\beta$  be sub-Gaussian. If  $(3\tau - 1)\varrho_{2s}^-(\Xi^{1/2}\widetilde{Z}/\sqrt{n}) - (\tau + 1)\varrho_{2s}^+(\Xi^{1/2}\widetilde{Z}/\sqrt{n}) \geq 4\tau\phi_0$  for some constant  $\phi_0 > 0$  and  $\|\widetilde{Z}^\top \Xi \epsilon\|_\infty \leq n\lambda/\tau$ , then, with  $\lambda = \tau\tilde{\omega}\sqrt{(\log p)/n}$  for some constant  $\tilde{\omega} > 0$ , the following holds true:*

$$\mathbb{P}\left(\|\widehat{\beta} - \beta\|_1 \geq s\lambda(2 + 1/\tau)/\phi_0\right) \leq 2p^{-\omega'},$$

where  $\omega' = \tilde{\omega}^2/(2K^2) - 1$  and  $K^2 = \max_{1 \leq j \leq p} \widehat{\Sigma}_{jj}$ .

*Proof.* Theorem S1. Let  $\mathbf{h} = \widehat{\beta} - \beta$ , and  $S_h$  be the set of indices of the  $s$  largest absolute values of  $\mathbf{h}$ . Then, given  $\Xi$  and  $\mathbf{u}$ , we have the following inequality

$$\frac{1}{2n} \|\Xi^{1/2}(\mathbf{u} - \widetilde{Z}\widehat{\beta})\|_2^2 + \lambda \|\widehat{\beta}\|_1 \leq \frac{1}{2n} \|\Xi^{1/2}(\mathbf{u} - \widetilde{Z}\beta)\|_2^2 + \lambda \|\beta\|_1$$

Thus, we have

$$\begin{aligned} & \frac{1}{2n} (\|\Xi^{1/2}(\epsilon - \widetilde{Z}\mathbf{h})\|_2^2 - \|\Xi^{1/2}\epsilon\|_2^2) \leq \lambda (\|\beta\|_1 - \|\widehat{\beta}\|_1) \\ \Rightarrow & -\frac{1}{2n} (\widetilde{Z}\mathbf{h})^\top \Xi (2\epsilon - \widetilde{Z}\mathbf{h}) \leq \lambda (\|\beta_{\text{supp}(\beta)}\|_1 - \|\widehat{\beta}_{\text{supp}(\beta)}\|_1 - \|\widehat{\beta}_{\text{supp}(\beta)^c}\|_1) \\ \Rightarrow & -\frac{1}{n} \mathbf{h}^\top \widetilde{Z}^\top \Xi \epsilon \leq \lambda (\|\beta_{\text{supp}(\beta)} - \widehat{\beta}_{\text{supp}(\beta)}\|_1 - \|\mathbf{h}_{\text{supp}(\beta)^c}\|_1) \\ \Rightarrow & -\frac{1}{n} \|\widetilde{Z}^\top \Xi \epsilon\|_\infty \|\mathbf{h}\|_1 \leq \lambda (\|\mathbf{h}_{\text{supp}(\beta)}\|_1 - \|\mathbf{h}_{\text{supp}(\beta)^c}\|_1) \\ \Rightarrow & -\frac{1}{n} \|\widetilde{Z}^\top \Xi \epsilon\|_\infty (\|\mathbf{h}_{S_h}\|_1 + \|\mathbf{h}_{S_h^c}\|_1) \leq \lambda (\|\mathbf{h}_{S_h}\|_1 - \|\mathbf{h}_{S_h^c}\|_1) \\ \Rightarrow & -(\|\mathbf{h}_{S_h}\|_1 + \|\mathbf{h}_{S_h^c}\|_1) \leq \tau (\|\mathbf{h}_{S_h}\|_1 - \|\mathbf{h}_{S_h^c}\|_1) \quad \text{since } \|\widetilde{Z}^\top \Xi \epsilon\|_\infty \leq n\lambda/\tau \\ \Rightarrow & \|\mathbf{h}_{S_h^c}\|_1 \leq \frac{\tau+1}{\tau-1} \|\mathbf{h}_{S_h}\|_1 \end{aligned} \tag{S11}$$

From the KKT condition of Objective function (5), we have  $\|\widetilde{Z}^\top \Xi(\mathbf{u} - \widetilde{Z}\widehat{\beta}) - \eta\boldsymbol{\nu}\|_\infty \leq n\lambda$  for some  $\eta \in \mathbb{R}$ , which provides the following inequalities:

$$\begin{aligned} \|\widetilde{Z}^\top \Xi(\mathbf{u} - \widetilde{Z}\widehat{\beta})\|_\infty &= \|(\mathcal{I}_p - \boldsymbol{\nu}^\top/k)(\widetilde{Z}^\top \Xi(\mathbf{u} - \widetilde{Z}\widehat{\beta}) - \eta\boldsymbol{\nu})\|_\infty \\ &= \|(\widetilde{Z}^\top \Xi(\mathbf{u} - \widetilde{Z}\widehat{\beta}) - \eta\boldsymbol{\nu}) - \boldsymbol{\nu}^\top(\widetilde{Z}^\top \Xi(\mathbf{u} - \widetilde{Z}\widehat{\beta}) - \eta\boldsymbol{\nu})/k\|_\infty \\ &\leq \|\widetilde{Z}^\top \Xi(\mathbf{u} - \widetilde{Z}\widehat{\beta}) - \eta\boldsymbol{\nu}\|_\infty + \|\boldsymbol{\nu}^\top(\widetilde{Z}^\top \Xi(\mathbf{u} - \widetilde{Z}\widehat{\beta}) - \eta\boldsymbol{\nu})/k\|_\infty \\ &= 2\|\widetilde{Z}^\top \Xi(\mathbf{u} - \widetilde{Z}\widehat{\beta}) - \eta\boldsymbol{\nu}\|_\infty \\ &\leq 2n\lambda, \end{aligned}$$

and

$$\begin{aligned} \|\tilde{Z}^\top \Xi \tilde{Z} \mathbf{h}\|_\infty &\leq \|\tilde{Z}^\top \Xi (\mathbf{u} - \tilde{Z} \hat{\boldsymbol{\beta}})\|_\infty + \|\tilde{Z}^\top \Xi (\mathbf{u} - \tilde{Z} \boldsymbol{\beta})\|_\infty \leq 2n\lambda + \|\tilde{Z}^\top \Xi \boldsymbol{\epsilon}\|_\infty \\ &\leq n\lambda(2 + 1/\tau). \end{aligned} \quad (\text{S12})$$

Thus, we have

$$\begin{aligned} n\lambda(2 + 1/\tau) \|\mathbf{h}_{S_h}\|_1 &\geq \|\tilde{Z}^\top \Xi \tilde{Z} \mathbf{h}\|_\infty \|\mathbf{h}_{S_h}\|_1 \geq \langle \tilde{Z}^\top \Xi \tilde{Z} \mathbf{h}, \mathbf{h}_{S_h} \rangle \\ &= \langle \Xi^{1/2} \tilde{Z} \mathbf{h}_{S_h}, \Xi^{1/2} \tilde{Z} \mathbf{h}_{S_h} \rangle + \langle \Xi^{1/2} \tilde{Z} \mathbf{h}_{S_h}, \Xi^{1/2} \tilde{Z} \mathbf{h}_{S_h^c} \rangle. \end{aligned}$$

By Lemma 5.1 in Cai and Zhang (2013), we have

$$\begin{aligned} |\langle \Xi^{1/2} \tilde{Z} \mathbf{h}_{S_h}, \Xi^{1/2} \tilde{Z} \mathbf{h}_{S_h^c} \rangle| &\leq \sqrt{s} \theta_{s,s}(\Xi^{1/2} \tilde{Z}) \|\mathbf{h}_{S_h}\|_2 \cdot \max(\|\mathbf{h}_{S_h^c}\|_\infty, \|\mathbf{h}_{S_h^c}\|_1/s) \\ &\leq \sqrt{s} \theta_{s,s}(\Xi^{1/2} \tilde{Z}) \|\mathbf{h}_{S_h}\|_2 \cdot \frac{\tau + 1}{\tau - 1} \|\mathbf{h}_{S_h}\|_1/s \\ &\leq \frac{\tau + 1}{\tau - 1} \theta_{s,s}(\Xi^{1/2} \tilde{Z}) \|\mathbf{h}_{S_h}\|_2^2. \end{aligned}$$

Thus,

$$\begin{aligned} n\lambda(2 + 1/\tau) \|\mathbf{h}_{S_h}\|_1 &\geq \|\Xi^{1/2} \tilde{Z} \mathbf{h}_{S_h}\|_2^2 - \frac{\tau + 1}{\tau - 1} \theta_{s,s}(\Xi^{1/2} \tilde{Z}) \|\mathbf{h}_{S_h}\|_2^2 \\ &\geq \left[ \varrho_{2s}^-(\Xi^{1/2} \tilde{Z}) - \frac{\tau + 1}{\tau - 1} \theta_{s,s}(\Xi^{1/2} \tilde{Z}) \right] \|\mathbf{h}_{S_h}\|_2^2 \\ &\geq \left[ \frac{3\tau - 1}{2\tau - 2} \varrho_{2s}^-(\Xi^{1/2} \tilde{Z}) - \frac{\tau + 1}{2\tau - 2} \varrho_{2s}^+(\Xi^{1/2} \tilde{Z}) \right] \|\mathbf{h}_{S_h}\|_1^2/s \end{aligned} \quad (\text{S13})$$

The last inequality comes from Lemma 1 of Kang *et al.* (2016) that shows a relationship between  $\theta_{s,s}$  and  $\varrho_{2s}^\pm$ , i.e.,  $\theta_{k_1, k_2}(A) \leq [\varrho_{k_1+k_2}^+(A) - \varrho_{k_1+k_2}^-(A)]/2$  for any matrix  $A$ . By rearranging Inequality (S13), we have

$$\|\mathbf{h}_{S_h}\|_1 \leq \frac{sn\lambda(2 + 1/\tau)}{n[(3\tau - 1)\varrho_{2s}^-(\Xi^{1/2} \tilde{Z}/\sqrt{n}) - (\tau + 1)\varrho_{2s}^+(\Xi^{1/2} \tilde{Z}/\sqrt{n})]/(2\tau - 2)} \leq \frac{s\lambda(2 + 1/\tau)}{2\tau\phi_0/(\tau - 1)}.$$

Therefore,

$$\|\hat{\boldsymbol{\beta}} - \boldsymbol{\beta}\|_1 = \|\mathbf{h}_{S_h}\|_1 + \|\mathbf{h}_{S_h^c}\|_1 \leq \frac{2\tau}{\tau - 1} \|\mathbf{h}_{S_h}\|_1 \leq s\lambda(2 + 1/\tau)/\phi_0,$$

so

$$\begin{aligned} \mathbb{P}(\|\hat{\boldsymbol{\beta}} - \boldsymbol{\beta}\|_1 \geq s\lambda(2 + 1/\tau)/\phi_0) &\leq \mathbb{P}(\|\tilde{Z}^\top \Xi \boldsymbol{\epsilon}\|_\infty > n\lambda/\tau) \leq \sum_{j=1}^p \mathbb{P}(|(\tilde{Z}^\top \Xi \boldsymbol{\epsilon})_j| > n\lambda/\tau) \\ &\leq 2p \exp\left(-\frac{n\lambda^2}{2\tau^2 K^2}\right) = 2p^{1-\tilde{\omega}^2/(2K^2)}. \end{aligned}$$

□

**Lemma S1.** *Suppose the regularity conditions hold, then for any constant  $\omega > 0$ , the following inequality holds:*

$$\mathbb{P}\left\{\left|\Theta \hat{\Sigma} - (\mathcal{I}_p - \boldsymbol{\mu}^\top/k)\right|_\infty \geq \omega \sqrt{(\log p)/n}\right\} \leq 2p^{-(\omega_1'' + \omega_2'')},$$

where  $\omega_1'' = \omega^2 C_{\min}/(24e^2 \kappa^4 C_{\max}) - 2$  and  $\omega_2'' = (\omega\phi_0)^2/[2(v's(2\tau + 1)K)^2] - 1$ .

*Proof.* Lemma S1.

$$|\Theta\widehat{\Sigma} - (\mathcal{I}_p - \boldsymbol{u}^\top/k)|_\infty \leq |\Theta\Sigma - (\mathcal{I}_p - \boldsymbol{u}^\top/k)|_\infty + |\Theta(\Sigma - \widehat{\Sigma})|_\infty$$

Since  $\Sigma^{1/2}\Theta^{1/2}\widetilde{Z}_l = (\mathcal{I}_p - \boldsymbol{u}^\top/k)\widetilde{Z}_l = \widetilde{Z}_l$  for  $l = 1, \dots, n$ , we have

$$\begin{aligned} \Theta\Sigma - (\mathcal{I}_p - \boldsymbol{u}^\top/k) &= \frac{1}{n} \sum_{l=1}^n \left\{ \Xi_{ll} \Theta \widetilde{Z}_l \widetilde{Z}_l^\top - (\mathcal{I}_p - \boldsymbol{u}^\top/k) \right\} \\ &= \frac{1}{n} \sum_{l=1}^n \left\{ \Xi_{ll} \Theta^{1/2} \Theta^{1/2} \widetilde{Z}_l \widetilde{Z}_l^\top \Theta^{1/2} \Sigma^{1/2} - (\mathcal{I}_p - \boldsymbol{u}^\top/k) \right\} \end{aligned}$$

For  $i, j = 1, \dots, p$ , define  $v_l^{(ij)} = \Xi_{ll} \Theta_i^{1/2} \Theta^{1/2} \widetilde{Z}_l \widetilde{Z}_l^\top \Theta^{1/2} \Sigma_j^{1/2} - (\mathcal{I}_p - \boldsymbol{u}^\top/k)_{ij}$ , where  $A_{k\cdot}$  is the  $k^{\text{th}}$  row vector of matrix  $A$  and  $A_{\cdot k}$  is the  $k^{\text{th}}$  column vector of matrix  $A$ . Notice that  $\mathbb{E}v_l^{(ij)} = 0$  since  $\mathbb{E}(\Xi_{ll} \Theta \widetilde{Z}_l \widetilde{Z}_l^\top) = \Theta\Sigma = \mathcal{I}_p - \boldsymbol{u}^\top/k$ . Following the proof of Lemma 23 in Javanmard and Montanari (2014), we have

$$\begin{aligned} \|v_l^{(ij)}\|_{\psi_1} &\leq 2 \|\Xi_{ll} \Theta_i^{1/2} \Theta^{1/2} \widetilde{Z}_l \widetilde{Z}_l^\top \Theta^{1/2} \Sigma_j^{1/2}\|_{\psi_1} \\ &\leq 2 \|\Xi_{ll}^{1/2} \Theta_i^{1/2} \Theta^{1/2} \widetilde{Z}_l\|_{\psi_2} \|\Xi_{ll}^{1/2} \Sigma_j^{1/2} \Theta^{1/2} \widetilde{Z}_l\|_{\psi_2} \\ &\leq 2 \|\Theta_i^{1/2}\|_2 \|\Sigma_j^{1/2}\|_2 \|\Xi_{ll}^{1/2} \Theta^{1/2} \widetilde{Z}_l\|_{\psi_2} \|\Xi_{ll}^{1/2} \Theta^{1/2} \widetilde{Z}_l\|_{\psi_2} \\ &\leq 2\kappa^2 \sqrt{C_{\max}/C_{\min}}. \end{aligned}$$

Let  $\kappa' = 2\sqrt{C_{\max}/C_{\min}}\kappa^2$ . Then, by the Bernstein-type inequality for centered sub-exponential random variable (Bühlmann and van de Geer, 2011), we have

$$\mathbb{P}\left\{\frac{1}{n} \left| \sum_{l=1}^n v_l^{(ij)} \right| \geq \gamma\right\} \leq 2 \exp\left\{-\frac{n}{6} \min\left[\left(\frac{\gamma}{e\kappa'}\right)^2, \frac{\gamma}{e\kappa'}\right]\right\}.$$

Choosing  $\gamma = \omega\sqrt{(\log p)/n}$  with  $\omega \leq e\kappa'\sqrt{n/\log p}$ , we have

$$\mathbb{P}\left\{\frac{1}{n} \left| \sum_{l=1}^n v_l^{(ij)} \right| \geq \omega\sqrt{(\log p)/n}\right\} \leq 2p^{-\omega^2/(6e^2\kappa'^2)} = 2p^{-\omega^2 C_{\min}/(24e^2\kappa^4 C_{\max})}.$$

By union bounding over all pairs of  $(i, j)$ , we have

$$\mathbb{P}\left\{|\Theta\Sigma - (\mathcal{I}_p - \boldsymbol{u}^\top/k)|_\infty \geq \omega\sqrt{(\log p)/n}\right\} \leq 2p^{-\omega^2 C_{\min}/(24e^2\kappa^4 C_{\max})+2}. \quad (\text{S14})$$

Define  $v' = |v \sum_{l=1}^n \Theta \widetilde{Z}_l \widetilde{Z}_l^\top / n|_\infty$ . Then,

$$|\Theta(\Sigma - \widehat{\Sigma})|_\infty = \frac{1}{n} \left| \sum_{l=1}^n [(\Xi_{ll} - \widehat{\Xi}_{ll}) \Theta \widetilde{Z}_l \widetilde{Z}_l^\top] \right|_\infty \leq v' \|\widehat{\boldsymbol{\beta}} - \boldsymbol{\beta}\|_1.$$

Thus, by Theorem S1, we have

$$\begin{aligned} \mathbb{P}\left\{|\Theta(\Sigma - \widehat{\Sigma})|_\infty \geq \omega\sqrt{(\log p)/n}\right\} &\leq \mathbb{P}\left\{v' \|\widehat{\boldsymbol{\beta}} - \boldsymbol{\beta}\|_1 \geq \omega\sqrt{(\log p)/n}\right\} \\ &\leq 2p^{1-(\omega\phi_0)^2/[2(v's(2\tau+1)K)^2]}. \end{aligned} \quad (\text{S15})$$

With Bounds (S14)-(S15), we have

$$\mathbb{P}\left\{|\Theta\widehat{\Sigma} - (\mathcal{I}_p - \boldsymbol{u}^\top/k)|_\infty \geq \omega\sqrt{(\log p)/n}\right\} \leq 2p^{-\omega''} + 2p^{-\omega''}.$$

□



*Proof.* Asymptotic properties of debiased estimators. Since  $\boldsymbol{\iota}^\top \boldsymbol{\beta} = \boldsymbol{\iota}^\top \widehat{\boldsymbol{\beta}} = 0$ , we have

$$\begin{aligned}\widehat{\boldsymbol{\beta}}_{db} - \boldsymbol{\beta} &= \widehat{\boldsymbol{\beta}} - \boldsymbol{\beta} + \frac{1}{n} \widetilde{\boldsymbol{\Theta}} \widetilde{\boldsymbol{Z}}^\top \widehat{\boldsymbol{\Xi}} (\widehat{\boldsymbol{u}} - \widetilde{\boldsymbol{Z}} \widehat{\boldsymbol{\beta}}) \\ &= \frac{1}{n} \widetilde{\boldsymbol{\Theta}} \widetilde{\boldsymbol{Z}}^\top \widehat{\boldsymbol{\Xi}} \boldsymbol{\epsilon} + (\widetilde{\boldsymbol{\Theta}} \widehat{\boldsymbol{\Sigma}} - \mathcal{I}_p) (\boldsymbol{\beta} - \widehat{\boldsymbol{\beta}}) \\ &= \frac{1}{n} \widetilde{\boldsymbol{\Theta}} \widetilde{\boldsymbol{Z}}^\top \widehat{\boldsymbol{\Xi}} \boldsymbol{\epsilon} + [\widetilde{\boldsymbol{\Theta}} \widehat{\boldsymbol{\Sigma}} - (\mathcal{I}_p - \boldsymbol{\mu}^\top / k)] (\boldsymbol{\beta} - \widehat{\boldsymbol{\beta}}).\end{aligned}$$

Thus,  $\sqrt{n}(\widehat{\boldsymbol{\beta}}_{db} - \boldsymbol{\beta}) = R + \Delta$ , where  $R = \widetilde{\boldsymbol{\Theta}} \widetilde{\boldsymbol{Z}}^\top \widehat{\boldsymbol{\Xi}} \boldsymbol{\epsilon} / \sqrt{n}$  and  $\Delta = \sqrt{n}[\widetilde{\boldsymbol{\Theta}} \widehat{\boldsymbol{\Sigma}} - (\mathcal{I}_p - \boldsymbol{\mu}^\top / k)] (\boldsymbol{\beta} - \widehat{\boldsymbol{\beta}})$ . Since  $\mathbb{E}(\boldsymbol{\epsilon} | \widehat{\boldsymbol{\Xi}}, \widehat{\boldsymbol{u}}) = \mathbf{0}$ , we have  $\mathbb{E}(R | \widetilde{\boldsymbol{Z}}, \widehat{\boldsymbol{\Xi}}, \widehat{\boldsymbol{u}}) = \mathbf{0}$  and

$$\begin{aligned}\|\Delta\|_\infty &\leq \sqrt{n} |\widetilde{\boldsymbol{\Theta}} \widehat{\boldsymbol{\Sigma}} - (\mathcal{I}_p - \boldsymbol{\mu}^\top / k)|_\infty \|\widehat{\boldsymbol{\beta}} - \boldsymbol{\beta}\|_1 \\ &= \sqrt{n} |(\mathcal{I}_p - \boldsymbol{\mu}^\top / k) [\widetilde{\boldsymbol{\Theta}} \widehat{\boldsymbol{\Sigma}} - (\mathcal{I}_p - \boldsymbol{\mu}^\top / k)]|_\infty \|\widehat{\boldsymbol{\beta}} - \boldsymbol{\beta}\|_1 \\ &\leq \sqrt{n} \{ |\widetilde{\boldsymbol{\Theta}} \widehat{\boldsymbol{\Sigma}} - (\mathcal{I}_p - \boldsymbol{\mu}^\top / k)|_\infty + |\boldsymbol{\mu}^\top [\widetilde{\boldsymbol{\Theta}} \widehat{\boldsymbol{\Sigma}} - (\mathcal{I}_p - \boldsymbol{\mu}^\top / k)] / k|_\infty \} \|\widehat{\boldsymbol{\beta}} - \boldsymbol{\beta}\|_1 \\ &\leq 2\sqrt{n} |\widetilde{\boldsymbol{\Theta}} \widehat{\boldsymbol{\Sigma}} - (\mathcal{I}_p - \boldsymbol{\mu}^\top / k)|_\infty \|\widehat{\boldsymbol{\beta}} - \boldsymbol{\beta}\|_1.\end{aligned}$$

Therefore, by Lemma S1 and Theorem S1, we have

$$\begin{aligned}\mathbb{P}\left(\|\Delta\|_\infty \geq \frac{2\omega\tilde{\omega}(2\tau+1)s\log p}{\phi_0\sqrt{n}}\right) &\leq \mathbb{P}\left(\|\widehat{\boldsymbol{\beta}} - \boldsymbol{\beta}\|_1 \geq s\lambda(2+1/\tau)/\phi_0\right) \\ &\quad + \mathbb{P}\left(|\widetilde{\boldsymbol{\Theta}} \widehat{\boldsymbol{\Sigma}} - (\mathcal{I}_p - \boldsymbol{\mu}^\top / k)|_\infty \geq \omega\sqrt{(\log p)/n}\right) \\ &\leq 2p^{-\omega'} + 2p^{-\omega'_1} + 2p^{-\omega'_2}.\end{aligned}$$

□

## E Details of the Sensitivity Analysis

Because of the linear constraint,  $\mathbf{1}_k^\top \mathbf{b} = 0$ , we can write Model (2), excluding the covariates  $\mathbf{X}_i$  for notation simplicity, as

$$\begin{aligned}Y_i &= 1\{c_0 + cT_i + (\mathbf{b}_\rho)_{-k}^\top \text{alt}(\mathbf{M}_i) + U_{2i} > 0\} \\ &= 1\{c_0 + cT_i + (\mathbf{b}_\rho)_{-k}^\top (\text{alt}(\mathbf{m}_0) + \text{alt}(\mathbf{a})T_i + \text{alt}(\mathbf{U}_{1i})) + U_{2i} > 0\} \\ &= 1\{c_0^* + c^*T_i + U_{0i}^* > 0\},\end{aligned}$$

where  $(\mathbf{b}_\rho)_{-k} = ((b_1)_\rho, \dots, (b_{k-1})_\rho)^\top$ ,  $c_0^* = c_0 + (\mathbf{b}_\rho)_{-k}^\top \text{alt}(\mathbf{m}_0)$ ,  $c^* = c + (\mathbf{b}_\rho)_{-k}^\top \text{alt}(\mathbf{a})$ , and  $U_{0i}^* = (\mathbf{b}_\rho)_{-k}^\top \text{alt}(\mathbf{U}_{1i}) + U_{2i}$ . Thus, a probit regression model for the total effect of T on Y can be expressed as

$$Y_i = 1\{\tilde{c}_0 + \tilde{c}T_i + U_{0i} > 0\},$$

where  $\tilde{c}_0 = c_0^* / \Psi(\boldsymbol{\rho}, \mathbf{b}_\rho, \Sigma)$ ,  $\tilde{c} = c^* / \Psi(\boldsymbol{\rho}, \mathbf{b}_\rho, \Sigma)$ , and  $U_{0i} = U_{0i}^* / \Psi(\boldsymbol{\rho}, \mathbf{b}_\rho, \Sigma)$ , where  $\Psi(\boldsymbol{\rho}, \mathbf{b}_\rho, \Sigma) = [(\mathbf{b}_\rho)_{-k}^\top \Sigma (\mathbf{b}_\rho)_{-k} + 2\rho (\mathbf{b}_\rho)_{-k}^\top \text{diag}(\Sigma)^{1/2} + 1]^{1/2}$ . For a given  $j$ , we have

$$\text{Cov}[U_{0i}, \text{alt}(\mathbf{U}_{1i})_j] = ((\mathbf{b}_\rho)_{-k}^\top \Sigma_j + \rho \Sigma_{jj}^{1/2}) / \Psi(\boldsymbol{\rho}, \mathbf{b}_\rho, \Sigma), \quad (\text{S16})$$

where  $\Sigma_j$  is the  $j^{\text{th}}$  column of  $\Sigma$  and  $\Sigma_{jj}$  is the variance of  $\text{alt}(\mathbf{U}_{1i})_j$ . Because of the constraint on  $U_{0i}$  and  $U_{2i}$ , i.e., they follow the standard gaussian distribution, we can estimate  $\text{Cov}[U_{0i}, \text{alt}(\mathbf{U}_{1i})_j]$  with an estimated  $\mathbf{b}_{-k}$  under the assumption of  $\rho = 0$ . That is, we have  $k - 1$  unknown parameters  $(\mathbf{b}_\rho)_{-k}$  and  $k - 1$  equations for a given value of  $\rho$ .

## References

- Aitchison, J. (1986). *The Statistical Analysis of Compositional Data*. New York: Chapman & Hall.
- Bühlmann, P. and van de Geer, S. (2011). *Statistics for High-Dimensional Data: Method, Theory and Applications*. Berlin: Springer.
- Cai, T. T. and Zhang, A. (2013). Compressed sensing and affine rank minimization under restricted isometry. *Signal Processing, IEEE Transactions*, **61**, 3279-3290.
- Imbens, G. and Rubin, D. (2015). *Causal Inference for Statistics, Social, and Biomedical Sciences: An Introduction*. Cambridge: Cambridge University Press.
- Javanmard, A. and Montanari, A. (2014). Confidence intervals and hypothesis testing for high-dimensional regression. *J. Mach. Learn. Res.*, **15**(1), 2869-2909.
- Kang, H., Zhang, A., Cai, T. T., and Small, D. S. (2016). Instrumental variables estimation with some invalid instruments and its application to mendelian randomization. *Journal of the American Statistical Association*, **111**(513), 132-144.
- Sohn, M. B. and Li, H. (2019). Compositional mediation analysis for microbiome studies. *Annals of Applied Statistics*, **13**(1), 661-681.
